# Supplementary material
Source: PubMed Central journal article supplement (PMC8142884)
Supplement: mmc1.pdf [file mmc1.pdf]

**Cell, Volume 184**

**Supplemental information**

**Binding and molecular basis of the bat coronavirus**

**RaTG13 virus to ACE2 in humans and other species**

**Kefang Liu, Xiaoqian Pan, Linjie Li, Feng Yu, Anqi Zheng, Pei Du, Pengcheng Han, Yumin Meng, Yanfang Zhang, Lili Wu, Qian Chen, Chunli Song, Yunfei Jia, Sheng Niu, Dan Lu, Chengpeng Qiao, Zhihai Chen, Dongli Ma, Xiaopeng Ma, Shuguang Tan, Xin Zhao, Jianxun Qi, George F. Gao, and Qihui Wang**

**Supplementary tables:**

**Table S1. The coding genes of 25 ACE2 orthologs, Related to Figure 2**

| Species of ACE2            | Organism                             | Database                | Code           |
|----------------------------|--------------------------------------|-------------------------|----------------|
| Human                      | <i>Homo sapiens</i>                  | NCBI Reference Sequence | NP_001358344.1 |
| Macaca                     | <i>Macaca fascicularis</i>           | NCBI Reference Sequence | XP_005593094.1 |
| Rabbit                     | <i>Oryctolagus cuniculus</i>         | NCBI Reference Sequence | XP_002719891.1 |
| Mouse                      | <i>Mus musculus</i>                  | NCBI Reference Sequence | NP_001123985.1 |
| Rat                        | <i>Rattus norvegicus</i>             | NCBI Reference Sequence | NP_001012006.1 |
| Malayan pangolin           | <i>Manis javanica</i>                | NCBI Reference Sequence | XP_017505746.1 |
| Cat                        | <i>Lynx canadensis</i>               | NCBI Reference Sequence | XP_030160839.1 |
| Civet                      | <i>Paguma larvata</i>                | NCBI Reference Sequence | Q56NL1.1       |
| Fox                        | <i>Vulpes vulpes</i>                 | NCBI Reference Sequence | XP_025842512.1 |
| Dog                        | <i>Canis lupus familiaris</i>        | NCBI Reference Sequence | XP_005641049.1 |
| Raccon Dog                 | <i>Nyctereutes<br/>procyonoides</i>  | GenBank                 | ABW16956.1     |
| Horse                      | <i>Equus caballus</i>                | NCBI Reference Sequence | XP_001490241.1 |
| Pig                        | <i>Sus scrofa</i>                    | NCBI Reference Sequence | XP_020935033.1 |
| Wild bactrian camel        | <i>Camelus ferus</i>                 | NCBI Reference Sequence | XP_006194263.1 |
| Alpaca                     | <i>Vicugna pacos</i>                 | NCBI Reference Sequence | XP_006212709.1 |
| Bovine                     | <i>Bos taurus</i>                    | NCBI Reference Sequence | XP_005228486.1 |
| Goat                       | <i>Capra hircus</i>                  | NCBI Reference Sequence | XP_005701129.2 |
| Sheep                      | <i>Ovis aries</i>                    | NCBI Reference Sequence | XP_011961657.1 |
| Intermediate horseshoe bat | <i>Rhinolophus affinis</i>           | GenBank                 | QMQ39222.1     |
| Little brown bat           | <i>Myotis lucifugus</i>              | NCBI Reference Sequence | XP_023609439.1 |
| Fulvous fruit bat          | <i>Rousettus leschenaultii</i>       | GenBank                 | ADJ19219.1     |
| Greater horseshoe bat      | <i>Rhinolophus<br/>ferrumequinum</i> | NCBI Reference Sequence | BAH02663.1     |
| Least horseshoe bat        | <i>Rhinolophus pusillus</i>          | GenBank                 | ADN93477.1     |
| Big-eared horseshoe bat    | <i>Rhinolophus macrotis</i>          | GenBank                 | ADN93471.1     |
| Lesser hedgehog tenrec     | <i>Echinops telfairi</i>             | NCBI Reference Sequence | XP_004710002.1 |

**Table S3. The binding affinities between ACE2s and SARS-CoV-2 RBD, RaTG13 RBD or RaTG13 RBD mutants, Related to Figure 3**

| Species                    | Binding affinity ( $\mu\text{M}$ ) |                 |                 |                 |                 |                 |                 |                  |                   |
|----------------------------|------------------------------------|-----------------|-----------------|-----------------|-----------------|-----------------|-----------------|------------------|-------------------|
|                            | SARS-CoV-2 RBD                     | RaTG13-CoV RBD  | F449Y           | L486F           | Y493Q           | Y498Q           | D501N           | H505Y            | 6-mutant          |
| Human                      | $0.015 \pm 0.001^1$                | $3.86 \pm 1.1$  | $1.43 \pm 0.36$ | $0.88 \pm 0.16$ | $9.78 \pm 0.46$ | -- <sup>2</sup> | $0.34 \pm 0.03$ | $0.7 \pm 0.03$   | $0.028 \pm 0.001$ |
| Mouse                      | --                                 | $2.55 \pm 0.01$ | $1.02 \pm 0.41$ | $6.65 \pm 3.7$  | --              | --              | $35.6 \pm 10.5$ | $0.6 \pm 0.05$   | --                |
| Horse                      | $0.056 \pm 0.006$                  | $0.69 \pm 0.1$  | $0.48 \pm 0.15$ | $1.21 \pm 0.43$ | $0.33 \pm 0.07$ | $9.39 \pm 3.14$ | $0.25 \pm 0.04$ | $0.15 \pm 0.009$ | $0.111 \pm 0.001$ |
| Intermediate horseshoe bat | $0.382 \pm 0.054$                  | $42.3 \pm 15.4$ | --              | $21.4 \pm 9.9$  | --              | --              | $0.59 \pm 0.11$ | $5.82 \pm 0.74$  | $0.179 \pm 0.04$  |

<sup>1</sup> The binding affinities between ACE2s and RaTG13 RBD or RaTG13 RBD mutants are shown with the means  $\pm$  SD of three independent experiments.

<sup>2</sup> "--" means no detectable binding.

**Table S4. The capture level of the indicated MAb and concentrations of the indicated RBD, together with the calculated  $K_D$  in the SPR assay were listed,**

**Related to Figure 5.**

| MAbs      | Capture level (RU) | Solution       | Concentrations of Solutions (nM) | $K_D$            |
|-----------|--------------------|----------------|----------------------------------|------------------|
| H4        | 662.3 ± 4.97       | SARS-CoV-2 RBD | 6.25 12.5 25 50 100              | 1.72 ± 0.11nM    |
| B38       | 776.3 ± 12.55      | SARS-CoV-2 RBD | 50 100 200 400 800               | 10.9 ± 0.85nM    |
| CB6       | 744.1 ± 4.01       | SARS-CoV-2 RBD | 6.25 12.5 25 50 100              | 1.95 ± 0.17nM    |
| S2H14     | 575.1 ± 2.80       | SARS-CoV-2 RBD | 50 100 200 400 800               | 3.98 ± 0.462nM   |
| REGN10933 | 495.7 ± 4.69       | SARS-CoV-2 RBD | 1.5625 3.125 6.25 12.5 25        | 0.223 ± 0.0018nM |
| REGN10987 | 701.2 ± 9.03       | SARS-CoV-2 RBD | 6.25 12.5 25 50 100              | 1.66 ± 0.13nM    |
| C110      | 398.8 ± 9.90       | SARS-CoV-2 RBD | 6.25 12.5 25 50 100              | 0.122 ± 0.007nM  |
| H4        | 662.2 ± 4.88       | RaTG13 RBD     | 200 400 800 1600 3200            | --               |
| B38       | 757.1 ± 3.95       | RaTG13 RBD     | 200 400 800 1600 3200            | 963 ± 16.9nM     |
| CB6       | 744.2 ± 5.49       | RaTG13 RBD     | 50 100 200 400 800               | 39.0 ± 0.45nM    |
| S2H14     | 571.7 ± 2.17       | RaTG13 RBD     | 200 400 800 1600 3200            | --               |
| REGN10933 | 492.7 ± 5.02       | RaTG13 RBD     | 200 400 800 1600 3200            | 551 ± 20.2nM     |
| REGN10987 | 696.5 ± 11.82      | RaTG13 RBD     | 200 400 800 1600 3200            | 5930 ± 381nM     |
| C110      | 391.2 ± 24.53      | RaTG13 RBD     | 200 400 800 1600 3200            | 1100 ± 59.3nM    |

<sup>1</sup> The binding affinities between ACE2s and RaTG13 RBD or RaTG13 RBD mutants are shown with the means ± SD of three independent experiments.

<sup>2</sup> "--" means no detectable binding.

**Table S5. The information of donors, Related to Figure 5**

| Donors | Gender | Age | Developmental stage |
|--------|--------|-----|---------------------|
| 1      | Male   | 50  | Convalescent        |
| 2      | Male   | 51  | Convalescent        |
| 3      | Male   | 56  | Convalescent        |
| 4      | Male   | 20  | Convalescent        |
| 5      | Male   | 28  | Convalescent        |
| 6      | Female | 61  | Convalescent        |
| 7      | Male   | 30  | Healthy             |
| 8      | Female | 27  | Healthy             |
| 9      | Male   | 24  | Healthy             |
